# Supplementary material for: A Roadmap for Selecting and Utilizing Optimal Features in scRNA Sequencing Data Analysis for Stem Cell Research: A Comprehensive Review
Source: PubMed Central journal article supplement — Int J Stem Cells. 2024 Mar 27;17(4):347–62. doi: 10.15283/ijsc23170 (PMC11612217; doi:10.15283/ijsc23170), 2024-03-27
Supplement: ijsc-17-4-347-supple.pdf [file ijsc-17-4-347-supple.pdf]

**Supplementary Table S1.** Top 15 scientific sources and their metrics

| Source                              | NP  | LC    | H-index | G-index | M-index | TC     | PY start |
|-------------------------------------|-----|-------|---------|---------|---------|--------|----------|
| <i>Bioinformatics</i>               | 187 | 3,435 | 35      | 64      | 3.889   | 4,943  | 2015     |
| <i>Nature Communications</i>        | 134 | 5,244 | 41      | 71      | 5.125   | 5,439  | 2016     |
| <i>Nucleic Acids Research</i>       | 103 | 2,683 | 32      | 76      | 2.909   | 5,835  | 2013     |
| <i>Genome Biology</i>               | 84  | 3,761 | 39      | 84      | 3.9     | 7,377  | 2014     |
| <i>Methods in Molecular Biology</i> | 83  | 30    | 12      | 21      | 1.091   | 588    | 2013     |
| <i>Briefings in Bioinformatics</i>  | 70  | 50    | 14      | 25      | 1.556   | 749    | 2015     |
| <i>BMC Bioinformatics</i>           | 68  | 1,015 | 19      | 39      | 2.375   | 1,618  | 2016     |
| <i>Frontiers in Immunology</i>      | 57  | 459   | 11      | 24      | 1.833   | 633    | 2018     |
| <i>Frontiers in Genetics</i>        | 54  | 287   | 13      | 26      | 1.625   | 757    | 2016     |
| <i>Nature Methods</i>               | 54  | 318   | 37      | 54      | 3.364   | 7,859  | 2013     |
| <i>BMC Genomics</i>                 | 50  | 455   | 13      | 34      | 1.182   | 1,203  | 2013     |
| <i>PLOS Computational biology</i>   | 45  | 425   | 14      | 28      | 1.556   | 813    | 2015     |
| <i>Scientific Reports</i>           | 41  | 67    | 14      | 24      | 1.75    | 657    | 2016     |
| <i>Nature Biotechnology</i>         | 36  | 246   | 22      | 36      | 2.2     | 10,931 | 2014     |
| <i>Cell Reports</i>                 | 32  | 192   | 18      | 32      | 2.25    | 1,771  | 2016     |

This legend examines key bibliometric indicators for the top 15 sources that have published literature on single-cell RNA sequencing (scRNA-seq) analysis. These indicators include the number of publications (NP), local citations (LC), h-index (a metric that evaluates both the productivity and citation impact of the publications), g-index (a measure focused on highly cited publications), m-index (an evaluation of the impact based on an author's most cited works), total citations (TC), and average publications per year (PY). The analysis of these metrics offers valuable insights into the productivity, citation impact, and overall influence of these leading sources in the field of scRNA-Seq analysis.

**Supplementary Table S2.** A complete list of the most common pre-processing analysis features for scRNA-seq analysis

| Name                               | STAR  | Seurat | Monocle | kallisto | salmon | CellRanger | Scanpy | velocyto | scrn | Harmony | MAST | RacelD | scvi-tools |
|------------------------------------|-------|--------|---------|----------|--------|------------|--------|----------|------|---------|------|--------|------------|
| Quality control                    |       |        |         |          |        | Python/R   | Python |          |      |         | R    |        | Python     |
| Normalization & transformation     |       | R      |         |          |        | Python/R   | Python |          | R    |         | R    |        | Python     |
| Alignment                          | C/C++ |        |         |          |        | Python/R   | Python |          |      |         |      |        |            |
| UMIs                               | C/C++ |        |         | C/C++    | C++    | Python/R   | Python |          |      |         |      |        |            |
| Dimensionality reduction           |       | R      | R       |          |        | Python/R   | Python |          |      | R/C++   |      | R/C++  | Python     |
| Integration                        |       | R      | R       |          |        | Python/R   | Python |          | R    | R/C++   |      | R/C++  | Python     |
| Dimensionality reduction           |       | R      | R       |          |        | Python/R   | Python |          |      | R/C++   |      | R/C++  | Python     |
| Variable gene/alternative splicing |       | R      | R       |          |        | Python/R   | Python | Python/R | R    |         |      |        |            |
| Marker genes                       |       | R      | R       |          |        | Python/R   | Python |          |      |         |      | R/C++  |            |
| Imputation                         |       | R      | R       |          |        | Python/R   | Python |          |      |         |      | R/C++  | Python     |

Systematically categorize crucial steps in preprocessing single-cell RNA sequencing (scRNA-seq) analysis. Each table is divided into two distinct categories for immediate recognition: essential and advanced features. Essential steps, pivotal for the foundational analysis process, are marked in light orange. These steps are critical to ensure the integrity and quality of the data for subsequent analysis. Advanced features, marked in green, denote supplementary analysis techniques that, while not mandatory for all studies, can significantly enrich the analysis. These advanced options offer opportunities for deeper data exploration and can be tailored to address specific research inquiries. This dual-colour coding effectively guides users through the critical workflow of scRNA-seq analysis, distinguishing between indispensable steps and those that offer further depth and refinement to the research. UMIs: unique molecular identifiers.

**Supplementary Table S3.** A complete list of the most common downstream analysis features for scRNA-seq analysis

| Name                           | STAR  | Seurat | Monocle | kallisto | salmon | Cell Ranger | Scampy   | infer-<br>CNV | CellPhone-<br>DB | BackSPIN | SCENIC   | AUCCell | velocity | scran | MAST | RaceID | scvi-tools | SCDE   |
|--------------------------------|-------|--------|---------|----------|--------|-------------|----------|---------------|------------------|----------|----------|---------|----------|-------|------|--------|------------|--------|
| Clustering                     | R     | R      | R       |          |        | Python/R    | Python   |               |                  | Python   | Python/R |         |          |       |      | R/C++  |            | Python |
| Quality control                |       |        |         |          |        | Python/R    | Python   |               |                  |          |          |         |          |       |      | R      |            | Python |
| Normalization & transformation |       | R      |         |          |        | Python/R    | Python   |               |                  |          |          |         |          |       | R    |        |            | Python |
| Gene filtering                 |       | R      |         |          |        |             | Python   |               |                  | Python   |          |         |          |       |      |        |            |        |
| Alignment                      | C/C++ |        |         |          |        | Python/R    |          |               |                  |          |          |         |          |       |      |        |            |        |
| Visualization                  | C/C++ | R      | R       |          |        | Python/R    | Python   | R             | Python           |          | Python/R | R       | Python/R | R     |      | R/C++  |            | R      |
| Gene networks                  |       |        |         |          |        |             |          |               |                  |          |          |         |          |       |      |        |            |        |
| Classification                 |       |        |         |          |        |             |          |               |                  |          |          |         |          |       |      |        |            | Python |
| Ordering                       |       |        | R       |          |        |             | Python   |               |                  |          |          |         |          |       |      | R/C++  |            |        |
| Differential expression        |       | R      | R       |          |        | Python/R    | Python   |               |                  |          |          | R       | Python/R |       | R    | R/C++  |            | Python |
| Gene sets                      |       |        |         |          |        |             |          |               |                  |          |          |         |          |       |      |        |            |        |
| Interactive                    |       |        |         |          |        | Python/R    |          |               |                  |          |          | R       |          |       |      |        |            | R      |
| Quantification                 | C/C++ |        |         |          | C/C++  | C++         | Python/R |               |                  |          |          |         |          |       |      |        |            |        |
| Simulation                     |       |        |         |          |        | Python/R    | Python   |               |                  |          |          |         |          |       |      |        |            |        |
| Variants                       |       |        |         |          |        |             |          |               | R                |          |          |         |          |       |      |        |            |        |
| Expression patterns            |       |        | R       |          |        |             |          |               |                  |          |          |         |          |       |      |        |            | R/C++  |
| Cell cycle                     |       |        |         |          |        |             |          |               |                  |          |          |         |          |       |      |        |            | R      |
| Rare cells                     |       |        |         |          |        |             |          |               |                  |          |          |         |          |       |      |        |            | R/C++  |

The table systematically organizes key steps in single-cell RNA sequencing (scRNA-seq) analysis, highlighting features critical for downstream analysis. It is structured into two main categories for easy identification: essential and advanced features. Essential steps, crucial for the core analysis process, are highlighted in orange. These steps are to maintain data integrity and quality for further analysis. In contrast, advanced features, highlighted in green, represent additional analysis methods that, although not essential for every study, can greatly enhance the analysis. These advanced techniques allow for more in-depth exploration of the data and can be customized to meet specific research needs. The use of dual-colour coding serves as an effective navigation tool through the scRNA-seq analysis workflow, clearly differentiating between fundamental steps and those that provide additional insight and sophistication to the research.
